# Supplementary material for: Coordination polymers based on copper carboxylates and angular 2,5-bis(imidazol-1-yl)thiophene (thim2) ligand: sequential structural transformations
Source: Royal Society of Chemistry journal article supplement (doi:10.1039/c4ce02428a), 2015-01-01
Supplement: c4ce02428a1.pdf [file c4ce02428a1.pdf]

## Electronic Supplementary Information (ESI)

# Coordination Polymers Based on Copper Carboxylates and Angular 2,5-bis(imidazol-1-yl)thiophene (thim<sub>2</sub>) Ligand: Sequential Structural Transformations

Namita Singh<sup>a</sup>, Pratap Vishnoi<sup>b</sup> and Ganapathi Anantharaman<sup>\*a</sup>

<sup>a</sup>*Department of Chemistry, Indian Institute of Technology (IIT), Kanpur – 208016, India.*

<sup>b</sup>*Department of Chemistry, Indian Institute of Technology (IIT), Bombay, Powai, Mumbai –  
400076, India.*

*Email: [garaman@iitk.ac.in](mailto:garaman@iitk.ac.in).*

**Table S1:** Selected bond distances and angles for CPs **1-4**

| <b>1</b>          |            |                    |            |
|-------------------|------------|--------------------|------------|
| Cu(1)-O(3)        | 1.946(3)   | Cu(1)-N(4)#1       | 1.979(4)   |
| Cu(1)-O(1)        | 1.969(3)   | Cu(1)-N(1)         | 1.998(4)   |
| O(3)-Cu(1)-O(1)   | 173.55(13) | O(1)-Cu(1)-N(4)#1  | 90.54(14)  |
| O(3)-Cu(1)-N(4)#1 | 90.50(14)  | O(3)-Cu(1)-N(1)    | 92.54(14)  |
|                   |            | O(1)-Cu(1)-N(1)    | 87.67(14)  |
|                   |            | N(4)#1-Cu(1)-N(1)  | 168.53(15) |
| <b>2</b>          |            |                    |            |
| Cu(1)-O(2)        | 1.967(5)   | Cu(1)-N(1)         | 2.120(5)   |
| Cu(1)-O(1)        | 1.974(5)   | Cu(2)-O(5)         | 1.958(5)   |
| Cu(1)-O(4)        | 1.974(5)   | Cu(2)-O(6)         | 1.972(6)   |
| Cu(1)-O(3)        | 1.991(5)   | Cu(2)-O(7)         | 1.981(6)   |
| Cu(2)-O(8)        | 1.994(8)   | Cu(2)-N(4)         | 2.125(7)   |
|                   |            | Cu(1)-Cu(1)#1      | 2.6597(19) |
|                   |            | Cu(2)-Cu(2)#2      | 2.641(2)   |
| O(2)-Cu(1)-O(1)   | 167.6(2)   | O(2)-Cu(1)-Cu(1)#1 | 86.36(15)  |
| O(2)-Cu(1)-O(4)   | 87.7(2)    | O(1)-Cu(1)-Cu(1)#1 | 81.35(15)  |
| O(1)-Cu(1)-O(4)   | 90.3(2)    | O(4)-Cu(1)-Cu(1)#1 | 86.85(16)  |
| O(2)-Cu(1)-O(3)   | 90.2(2)    | O(3)-Cu(1)-Cu(1)#1 | 80.86(16)  |
| O(1)-Cu(1)-O(3)   | 89.1(2)    | N(1)-Cu(1)-Cu(1)#1 | 170.46(16) |
| O(4)-Cu(1)-O(3)   | 167.7(2)   | O(5)-Cu(2)-O(6)    | 168.1(2)   |
| O(2)-Cu(1)-N(1)   | 100.0(2)   | O(5)-Cu(2)-O(7)    | 89.8(2)    |
| O(1)-Cu(1)-N(1)   | 92.4(2)    | O(6)-Cu(2)-O(7)    | 90.8(3)    |
| O(4)-Cu(1)-N(1)   | 100.4(2)   | O(5)-Cu(2)-O(8)    | 87.2(3)    |
| O(3)-Cu(1)-N(1)   | 91.9(2)    | O(6)-Cu(2)-O(8)    | 89.7(3)    |
|                   |            | O(7)-Cu(2)-O(8)    | 167.9(3)   |
|                   |            | O(5)-Cu(2)-N(4)    | 95.1(2)    |
|                   |            | O(6)-Cu(2)-N(4)    | 96.6(3)    |
|                   |            | O(7)-Cu(2)-N(4)    | 96.6(3)    |
|                   |            | O(8)-Cu(2)-N(4)    | 95.3(3)    |
|                   |            | O(5)-Cu(2)-Cu(2)#2 | 81.87(16)  |
|                   |            | O(6)-Cu(2)-Cu(2)#2 | 86.35(17)  |
|                   |            | O(7)-Cu(2)-Cu(2)#2 | 84.12(18)  |
|                   |            | O(8)-Cu(2)-Cu(2)#2 | 83.8(2)    |
|                   |            | N(4)-Cu(2)-Cu(2)#2 | 176.9(2)   |
| <b>3</b>          |            |                    |            |
| Cu(1)-O(2)        | 1.957(4)   | Cu(1)-N(3)         | 2.003(4)   |
| Cu(1)-O(3)        | 1.979(4)   | Cu(1)-N(1)         | 2.007(4)   |
| Cu(1)-O(1)#1      | 2.311(4)   |                    |            |
| O(2)-Cu(1)-O(3)   | 158.95(16) | O(3)-Cu(1)-N(1)    | 90.16(16)  |
| O(2)-Cu(1)-N(3)   | 94.20(16)  | N(3)-Cu(1)-N(1)    | 175.99(18) |
| O(3)-Cu(1)-N(3)   | 89.79(16)  | O(2)-Cu(1)-O(1)#1  | 113.01(15) |
| O(2)-Cu(1)-N(1)   | 87.27(16)  |                    |            |
|                   |            | O(3)-Cu(1)-O(1)#1  | 87.52(14)  |
|                   |            | N(3)-Cu(1)-O(1)#1  | 91.04(16)  |
|                   |            | N(1)-Cu(1)-O(1)#1  | 84.96(16)  |
| <b>4</b>          |            |                    |            |
| Cu(1)-N(1)        | 1.990(6)   | Cu(2)-N(5)         | 1.982(6)   |
| Cu(1)-N(8)#1      | 1.974(6)   | Cu(2)-N(4)#2       | 1.989(6)   |
| Cu(1)-O(1)        | 1.968(5)   | Cu(2)-O(5)         | 1.952(5)   |
| Cu(1)-O(3)        | 1.978(5)   |                    |            |
|                   |            | Cu(2)-O(7)         | 1.955(6)   |
|                   |            | Cu(1)-O(9W)        | 2.399(5)   |
|                   |            | Cu(2)-O(9W)        | 2.330(5)   |

|                    |          |                   |           |                    |          |
|--------------------|----------|-------------------|-----------|--------------------|----------|
| O(1)-Cu(1)-N(8)#1  | 88.4(2)  | N(8)#1-Cu(1)-N(1) | 171.6(3)  | O(7)-Cu(2)-N(4)#2  | 86.3(2)  |
| O(1)-Cu(1)-N(1)    | 90.7(2)  | O(1)-Cu(1)-O(9W)  | 93.79(19) | N(5)-Cu(2)-N(4)#2  | 168.9(3) |
| O(1)-Cu(1)-O(3)    | 175.2(2) | N(1)-Cu(1)-O(9W)  | 95.1(2)   | O(5)-Cu(2)-O(9W)   | 89.1(2)  |
| O(3)-Cu(1)-N(1)    | 90.6(2)  | O(5)-Cu(2)-O(7)   | 173.1(2)  | O(7)-Cu(2)-O(9W)   | 96.6(2)  |
| N(8)#1-Cu(1)-O(3)  | 89.5(2)  | O(5)-Cu(2)-N(5)   | 92.7(2)   | N(5)-Cu(2)-O(9W)   | 91.3(2)  |
| N(8)#1-Cu(1)-O(9W) | 93.3(2)  | O(7)-Cu(2)-N(5)   | 91.1(3)   | N(4)#2-Cu(2)-O(9W) | 99.8(2)  |
| O(3)-Cu(1)-O(9W)   | 90.7(2)  | O(5)-Cu(2)-N(4)#2 | 88.9(2)   | Cu2 O9W Cu1        | 153.3(2) |

**Table S2.** Supra-molecular interactions present in **1-4**

| Compound no. | <i>D</i> -H... <i>A</i> | H... <i>A</i> Å | <i>D</i> ... <i>A</i> Å | <i>D</i> -H... <i>A</i> (°) |
|--------------|-------------------------|-----------------|-------------------------|-----------------------------|
| <b>1</b>     | C12-H12...S1            | 2.964(3)        | 3.619(6)                | 125.26(2)                   |
|              | C14-H14A... $\pi$       | 2.892(1)        | 3.641(1)                | 133.97(2)                   |
|              | C3-H3...O4              | 2.281(1)        | 3.120(7)                | 147.04(1)                   |
|              | C8-H8...O3              | 2.421(8)        | 3.275(6)                | 149.29(8)                   |
|              | C9-H9...O1              | 2.618(8)        | 3.348(9)                | 133.91(9)                   |
| <b>2</b>     | C15-H15... $\pi$        | 2.964(6)        | 3.802(5)                | 150.41(5)                   |
|              | C16-H16... $\pi$        | 2.914(5)        | 3.699(3)                | 147.11(3)                   |
|              | C3-H3...O7              | 2.691(1)        | 3.633(1)                | 171.72(1)                   |
|              | C6-H6...O3              | 2.670(4)        | 3.567(5)                | 157.82(1)                   |
| <b>3</b>     | C5-H5...O4              | 2.400(4)        | 3.201(5)                | 144.19(7)                   |
|              | C9-H9...O4              | 2.255(2)        | 3.140(4)                | 158.71(2)                   |
|              | C2-H2... $\pi$          | 3.018(9)        | 3.840(4)                | 148.20(1)                   |
| <b>4</b>     | C3-H3...O1              | 2.507(2)        | 3.257(2)                | 140.02(1)                   |

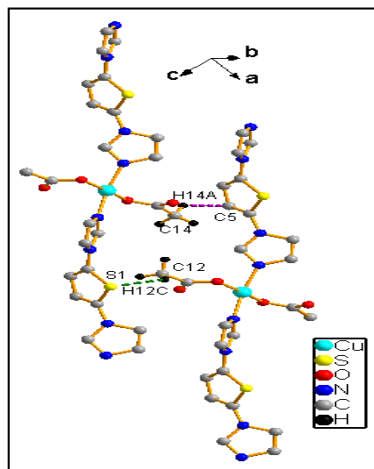

(a)

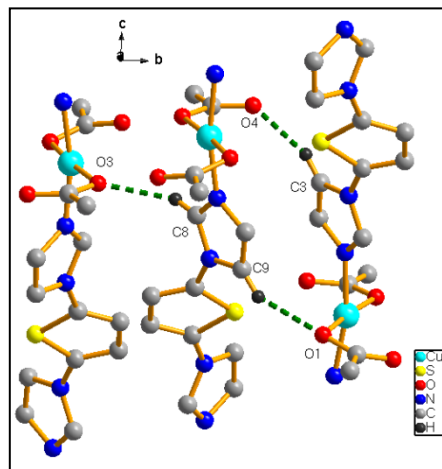

(b)

**Figure S1:** (a) Supra-molecular interactions between 1D chains along *a* direction (b) C–H···O interactions between 1D chain in *bc* plane

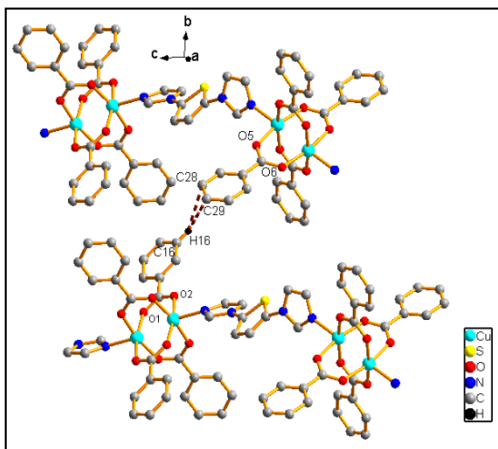

(a)

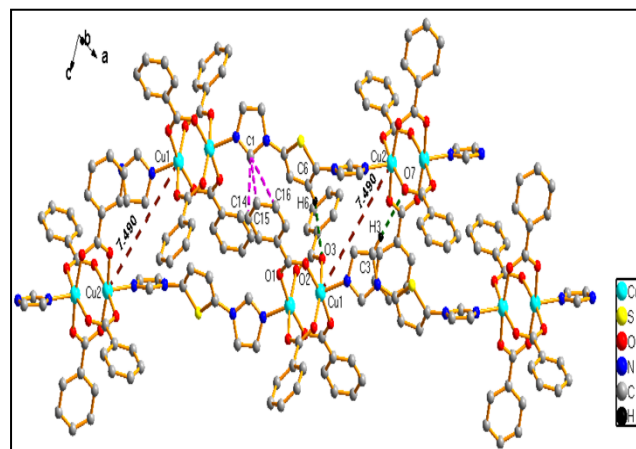

(b)

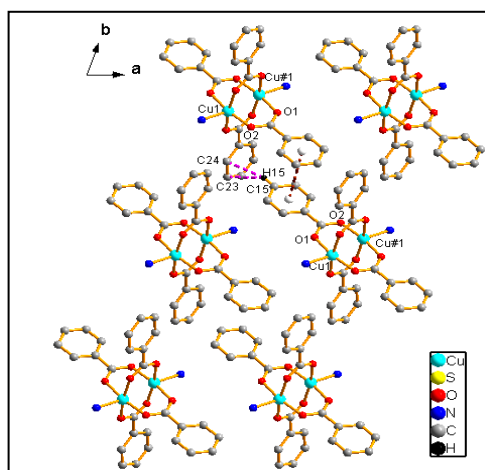

(c)

**Figure S2:** (a) C–H $\cdots$  $\pi$  interactions between 1D chains in *bc* plane (b) Supra-molecular interactions between 1D chains along *a* direction,  $\pi\cdots\pi = 3.830(6)$  Å (c) Supra-molecular interactions between 1D chains in *ab* plane,  $\pi\cdots\pi = 4.369$  Å

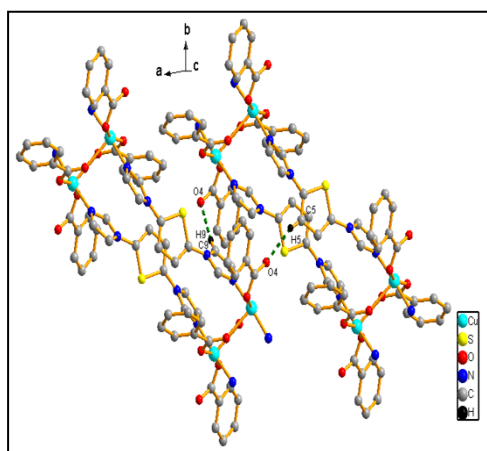

(a)

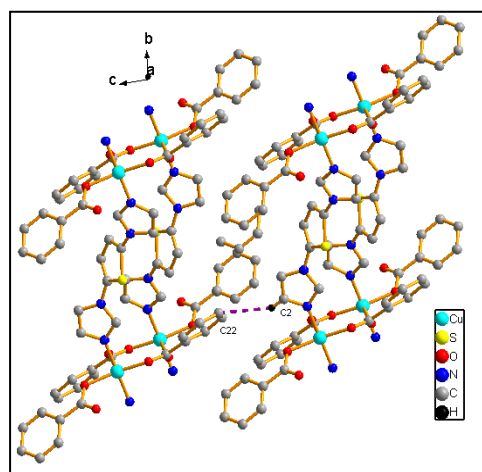

(b)

**Figure S3:** (a) C–H $\cdots$ O interactions between 1D chains along *a* direction, (b) C–H $\cdots$  $\pi$  interactions between 1D chains in *bc* plane

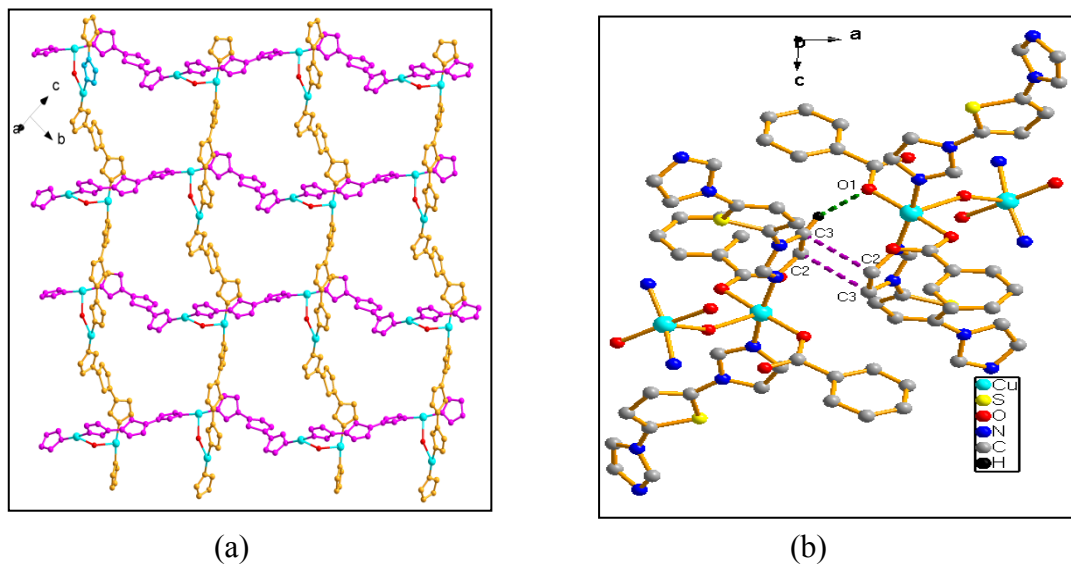

**Figure S4:** (a) View of the perpendicular helical chains making 2D plain weave like pattern (benzoate molecules are omitted for clarity) (b) supra-molecular interactions between 2D layer along *b* direction,  $\pi \cdots \pi = 3.252(7) \text{ \AA}$

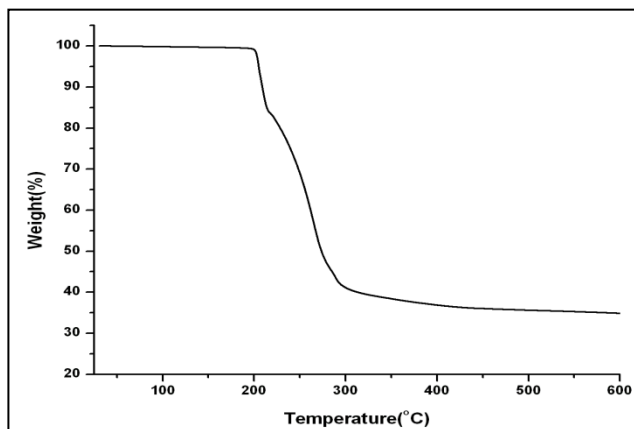

**Figure S5.** Thermogravimetric analysis of **1**

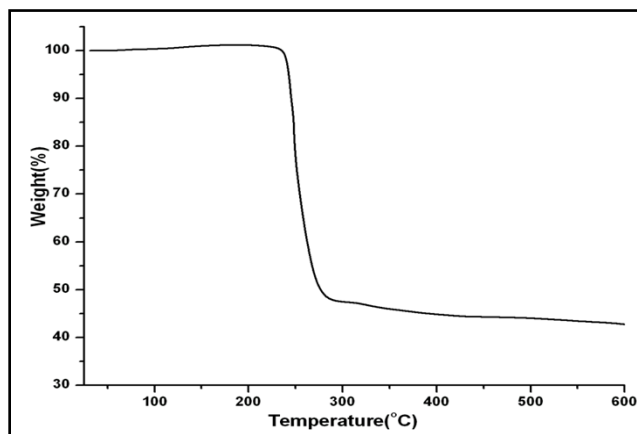

**Figure S6.** Thermogravimetric analysis of **2**

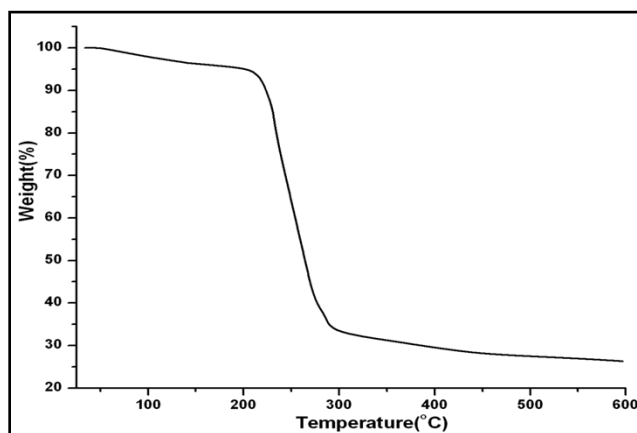

**Figure S7.** Thermogravimetric analysis of **3**

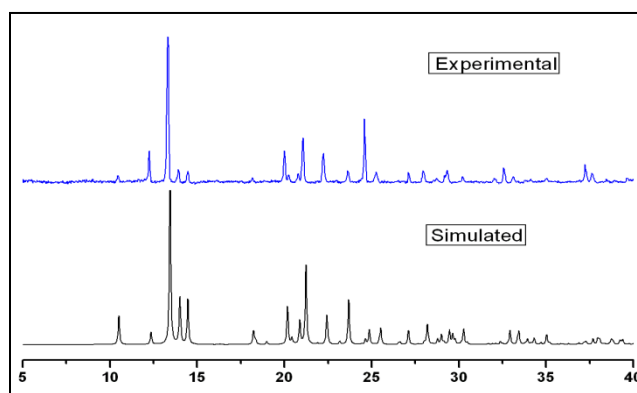

**Figure S8.** PXRD of **1**

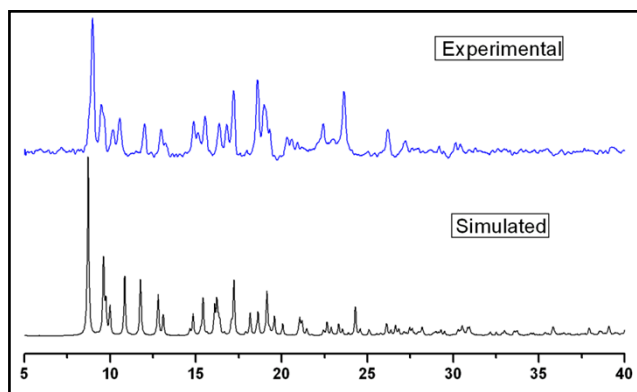

**Figure S9. PXR D of 2**

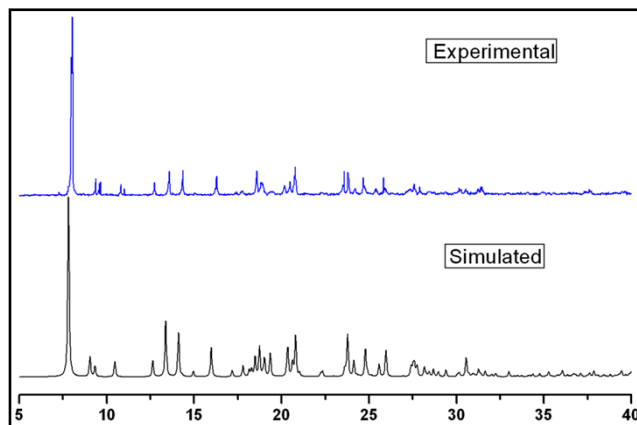

**Figure S10. PXR D of 3**
